# Supplementary material for: A Capsicum annuum L. seed extract exerts anti-neuroexcitotoxicity in HT22 hippocampal neurons
Source: Royal Society of Chemistry journal article supplement (doi:10.1039/d3fo04501c), 2024-01-01
Supplement: d3fo04501c2.pdf [file d3fo04501c2.pdf]

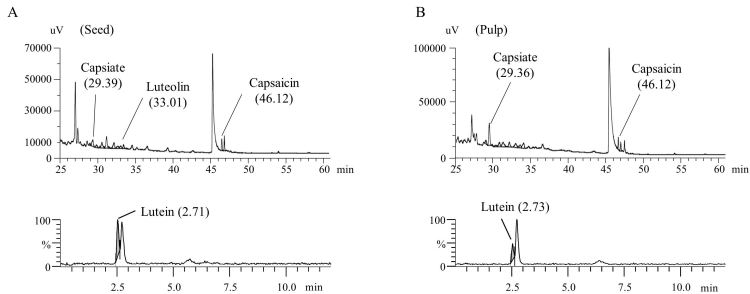

**C** Quantity of single compound in *Capsicum annuum* L seeds and pulps extract

| Compound name | Retention time (min) |       | Quantitative analysis ( $\mu\text{g/g}$ ) |         |
|---------------|----------------------|-------|-------------------------------------------|---------|
|               | Seed                 | Pulp  | Seed                                      | Pulp    |
| Capsiate      | 29.39                | 29.36 | 795.49                                    | 1694.11 |
| Capsaicin     | 46.12                | 46.12 | 228.35                                    | 167.42  |
| Luteolin      | 33.01                | -     | 37.93                                     | -       |
| Lutein        | 2.71                 | 2.73  | 1.56                                      | 0.14    |
