# Supplementary material for: A Capsicum annuum L. seed extract exerts anti-neuroexcitotoxicity in HT22 hippocampal neurons
Source: Royal Society of Chemistry journal article supplement (doi:10.1039/d3fo04501c), 2024-01-01
Supplement: d3fo04501c8.pdf [file d3fo04501c8.pdf]

1 **Supplementary figure 1. Fingerprinting analysis of the CSE and CPE.** Capsiate, capsaicin, luteolin,  
2 and lutein were detected in CSE (A) and CPE (B) using HPLC at a wavelength of 222 nm, and its  
3 retention time and quantification were displayed (C).

4

5 **Supplementary figure 2. CSE and CPE comparative effects, as well as the effects of CSE on BDNF**  
6 **expression.** The CPE was assessed for cytotoxicity (A) and cell viability (B) using a WST-8 assay on  
7 glutamate-induced HT22 cells. The cytotoxicity (C) and cell viability (D) of both CSE and CPE were  
8 evaluated simultaneously. The protein expression of BDNF were determined by western blotting  
9 analysis (E) in absence of glutamate-induced conditions. Signal intensities were analyzed in proportion  
10 to  $\alpha$ -tubulin (F). # $p < 0.05$  and ## $p < 0.01$  compared with the vehicle-treated cells; \*\* $p < 0.01$  compared  
11 with the glutamate-treated cells.

12

13
