# Supplementary figures and images for: A Capsicum annuum L. seed extract exerts anti-neuroexcitotoxicity in HT22 hippocampal neurons
Source: Royal Society of Chemistry journal article supplement (doi:10.1039/d3fo04501c), 2024-01-01

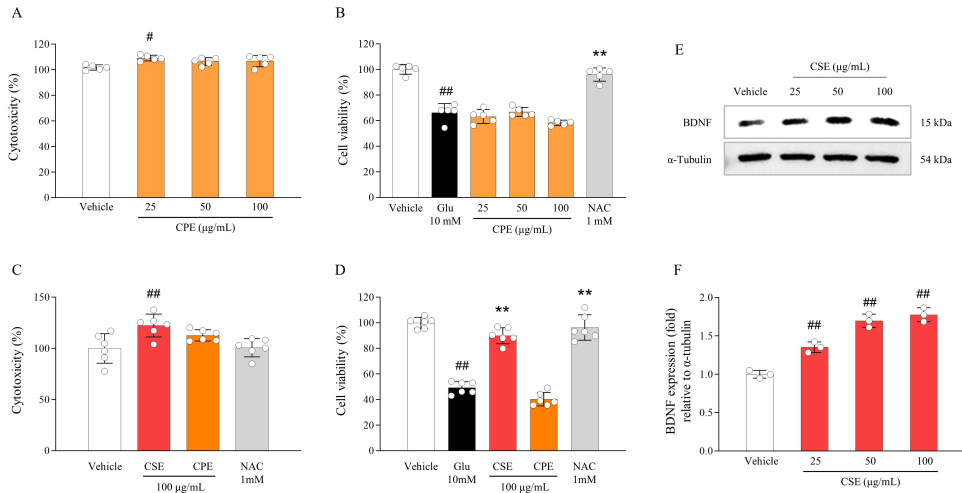

Supplement: d3fo04501c3.pdf [file d3fo04501c3.pdf]

Fig. 3A

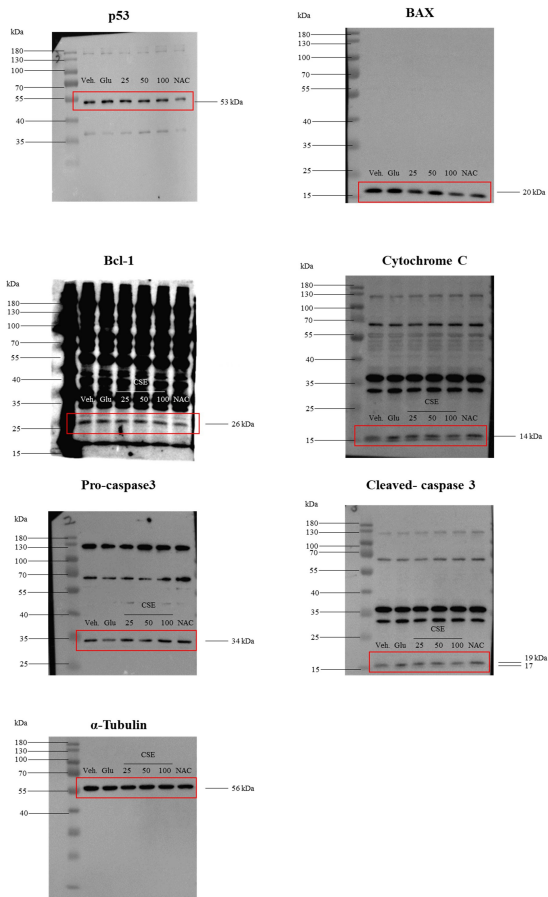

Supplement: d3fo04501c4.pdf [file d3fo04501c4.pdf]

Fig. 4A

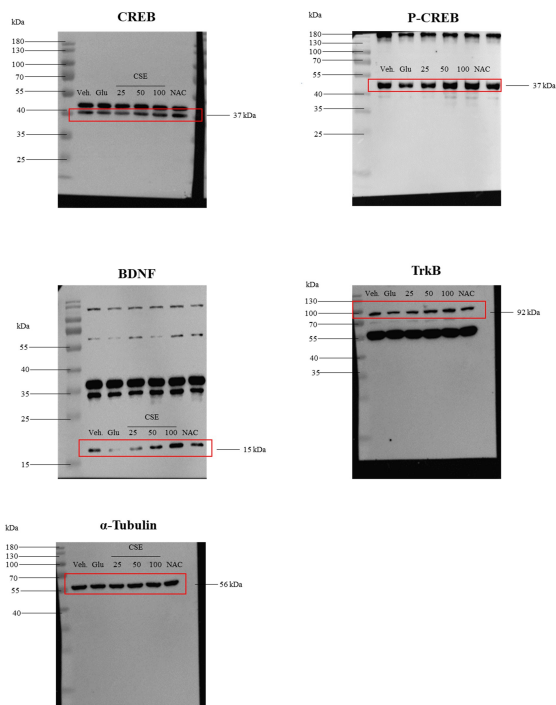

Supplement: d3fo04501c5.pdf [file d3fo04501c5.pdf]

Fig. 6A

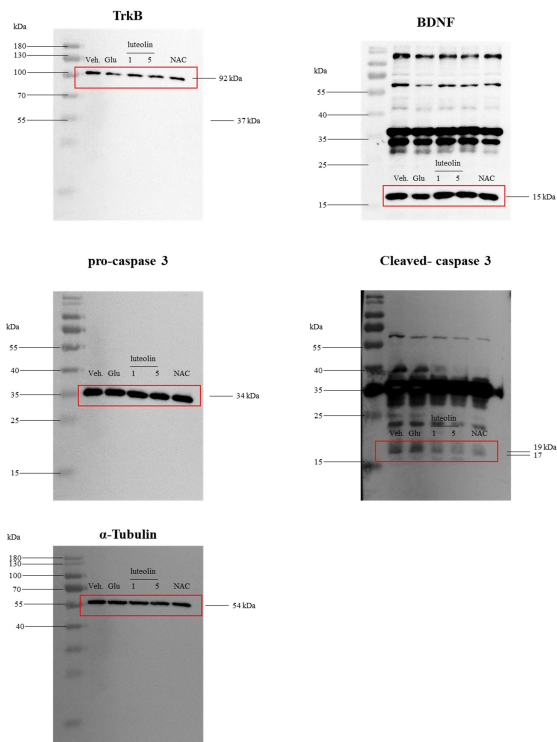

Supplement: d3fo04501c6.pdf [file d3fo04501c6.pdf]

Fig. S2E

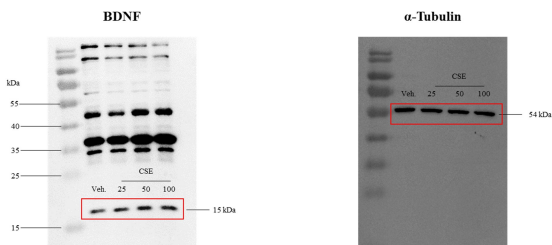

Supplement: d3fo04501c7.pdf [file d3fo04501c7.pdf]
